# Supplementary material for: Hydrothermal synthesis of organometal halide perovskites for Li-ion batteries
Source: Royal Society of Chemistry journal article supplement (doi:10.1039/c5cc05053g), 2015-01-01
Supplement: c5cc05053g1.pdf [file c5cc05053g1.pdf]

## Supporting Information:

### Hydrothermal Synthesis of Organometal Halide Perovskites for Li-ion Batteries

Hua-Rong Xia<sup>a,b</sup>, Wen-Tao Sun<sup>a,c\*</sup> and Lian-Mao Peng<sup>a,b,c\*</sup>

<sup>a</sup>Key Laboratory for the Physics and Chemistry of Nanodevices, Peking University, Beijing 100871, China

<sup>b</sup>Academy for Advanced Interdisciplinary Studies, Peking University, Beijing 100871, China

<sup>c</sup>Department of Electronics, Peking University, Beijing 100871, China

\*Email: [wtaosun@pku.edu.cn](mailto:wtaosun@pku.edu.cn); [lm peng@pku.edu.cn](mailto:lm peng@pku.edu.cn)

#### 1. Synthesis of perovskite $\text{CH}_3\text{NH}_3\text{PbX}_3$ (X=Br, I)

In a typical process, 1-5 g lead acetate ( $\text{Pb}(\text{CH}_3\text{COO})_2 \cdot 3\text{H}_2\text{O}$ ,  $\text{Pb}(\text{Ac})_2 \cdot 3\text{H}_2\text{O}$ ; Analytical Reagent, AR; Beijing Chemical Reagent Company) was added into a weighing bottle with the size of  $30 \times 70$  mm. Then, 15-20 mL HI/HBr solution (HI,  $\geq 45\%$ ; AR; Sinopharm Chemical Reagent Co., Ltd; HBr,  $\geq 40\%$ ; AR; Sinopharm Chemical Reagent Co., Ltd) and 3-6 mL methylamine alcohol solution ( $\text{CH}_3\text{NH}_2$ , 27.0-32.0%; CP; Sinopharm Chemical Reagent Co., Ltd) were added into the bottle. After that, put the bottle into a 100 mL Teflon-lined stainless steel autoclave, and heated at  $150^\circ\text{C}$  in an oven for 1-12 h. Finally it was taken out and cooled down to room temperature naturally. The obtained product was filtered, washed with superdry isopropanol (99.5%; J&K Scientific) and dried naturally.

To make the process clearer, the synthesis scheme for  $\text{CH}_3\text{NH}_3\text{PbX}_3$  was described in Scheme S1.

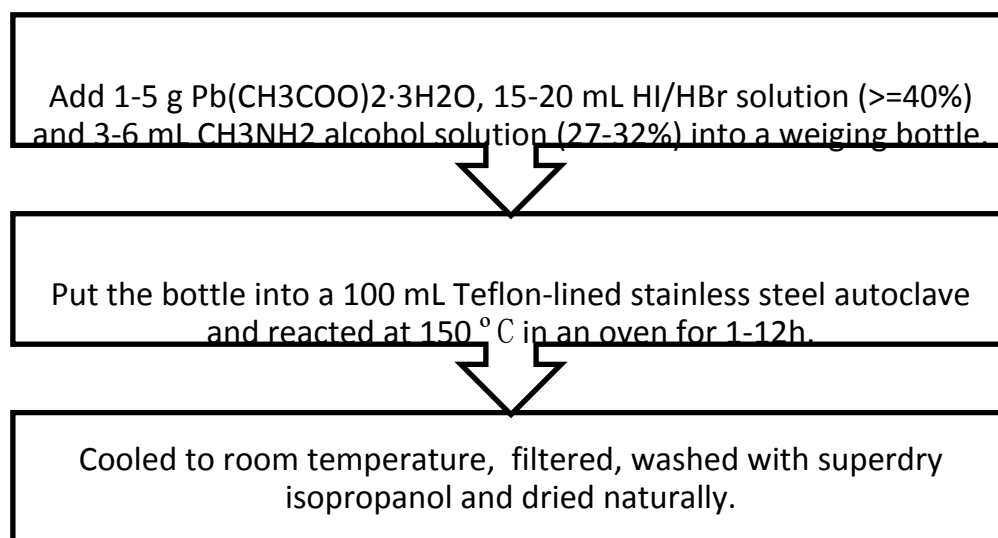

**Scheme S1.** Synthesis process of the perovskite  $\text{CH}_3\text{NH}_3\text{PbX}_3$ .

## 2. Material Characterizations of the perovskite $\text{CH}_3\text{NH}_3\text{PbX}_3$

A Rigaku D/max-rA12kW X-ray diffraction system equipped with a  $\text{Cu K}\alpha$  X-ray tube operated at 40 kV and 100 mA using a step size of  $0.02^\circ$  at a scanning rate of 8 degree per min was used to characterize the crystal structure of the obtained powder. The EDX (Energy Dispersive X-Ray Spectroscopy) spectrum of the product was measured under a FEI Tecnai G2 T20 TEM (transmission electron microscopy) to analyze the composition. And a field-emission gun FEI Quanta 600F SEM (scanning electron microscopy) was used to characterize the morphology of the materials.

## 3. Electrochemical Characterization

Standard CR2032 coin cells were assembled in an argon-filled glove box with the moisture content less than 1 ppm to test the electrochemical performance of the as-synthesized product. The test electrodes were made of perovskite  $\text{CH}_3\text{NH}_3\text{PbBr}_3$  (or  $\text{CH}_3\text{NH}_3\text{PbI}_3$ ), conductive carbon black and PVDF binder in an 80:10:10 mass ratio, which were coated on circular copper-foil current collectors with the diameter of 12 mm. Lithium metal electrode with the diameter of 16 mm and the thickness of 0.6 mm was used as the counter electrode. Two electrodes were separated by a layer of 25  $\mu\text{m}$  polymer membrane (Celgard®, average pore size: 43 nm) with 1 mol/L  $\text{LiPF}_6$  solution in EC+EMC+DMC (ethylene carbonate+ ethylmethyl carbonate+ dimethyl carbonate, volume ratio=1:1:1) as the electrolyte.

A LAND BT2013A 8-channel automatic battery test system (Wuhan Lanbo Test Equipment Co., Ltd) was used to measure the charge-discharge capacity and cycle performance. Cyclic voltammetry was tested on a CHI660C electrochemical workstation (Shanghai Chenhua Instruments Co., Ltd) at a sweep voltage range of 0.01-2.0 V with the rate of 1 mV/s.

**Table S1. Refined XRD result of the synthesized perovskite  $\text{CH}_3\text{NH}_3\text{PbBr}_3$  ( $a=5.9394 \text{ \AA}$ , space group=Pm-3m) and comparative results with standard perovskite material  $\text{CH}_3\text{NH}_3\text{PbBr}_3$  ( $a=5.9334 \text{ \AA}$ , space group=Pm-3m, Ref. 12 in the text)<sup>1</sup>.**

| hkl | d (Å)  | Exp. d (Å) | 2-theta (°) | Exp. 2-theta (°) | Ref. d (Å) | Ref. 2-theta (°) |
|-----|--------|------------|-------------|------------------|------------|------------------|
| 100 | 5.9394 | 5.9686     | 14.903      | 14.83            | 5.939482   | 14.91526         |
| 110 | 4.1998 | 4.2308     | 21.137      | 20.98            | 4.19655    | 21.15379         |
| 111 | -      | -          | -           | -                | 3.42647    | 25.98318         |
| 200 | 2.9697 | 2.9829     | 30.067      | 29.93            | 2.96741    | 30.09099         |
| 210 | 2.6562 | 2.665      | 33.715      | 33.6             | 2.65413    | 33.74296         |
| 220 | 2.0999 | 2.1045     | 43.039      | 42.94            | 2.09828    | 43.07498         |
| 300 | 1.9798 | 1.9828     | 45.793      | 45.72            | 1.97827    | 45.83172         |
| 310 | 1.8782 | 1.8798     | 48.424      | 48.38            | 1.87676    | 48.46513         |
| 222 | 1.7146 | 1.7146     | 53.392      | 53.39            | -          | -                |

|     |        |        |        |       |   |   |
|-----|--------|--------|--------|-------|---|---|
| 320 | 1.6473 | 1.6489 | 55.758 | 55.7  | - | - |
| 321 | 1.5874 | 1.5891 | 58.058 | 57.99 | - | - |
| 400 | 1.4849 | 1.4863 | 62.498 | 62.43 | - | - |
| 410 | 1.4405 | 1.4415 | 64.651 | 64.6  | - | - |
| 330 | 1.3999 | 1.3993 | 66.765 | 66.8  | - | - |
| 420 | 1.3281 | 1.3282 | 70.9   | 70.89 | - | - |
| 421 | 1.2961 | 1.2959 | 72.927 | 72.94 | - | - |
| 430 | 1.1879 | 1.1867 | 80.85  | 80.95 | - | - |
| 510 | 1.1648 | 1.1643 | 82.797 | 82.84 | - | - |
| 432 | 1.1029 | 1.1021 | 88.598 | 88.68 | - | - |

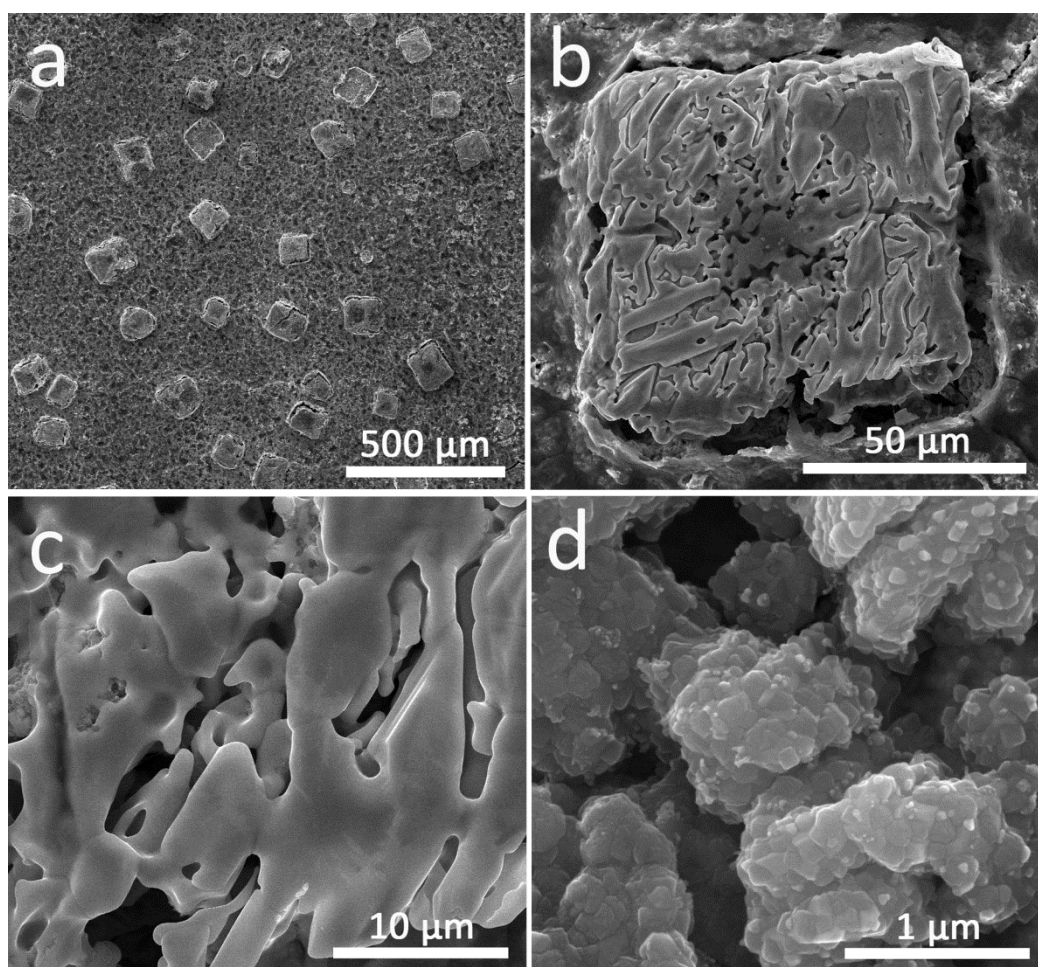

**Fig. S1** SEM images of the as-prepared  $\text{CH}_3\text{NH}_3\text{PbBr}_3$  test electrode with different magnifications (scale bar: 500  $\mu\text{m}$  for a, 50  $\mu\text{m}$  for b, 10  $\mu\text{m}$  for c, 1  $\mu\text{m}$  for d).

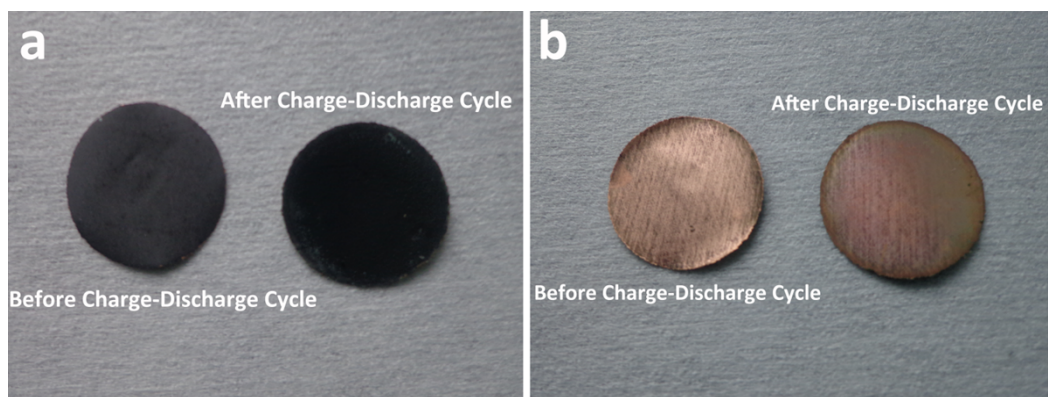

**Fig. S2** Photographs of the test electrodes before and after charge-discharge cycles: (a) One side with active material CH<sub>3</sub>NH<sub>3</sub>PbBr<sub>3</sub>. (b) The other side of the Cu foil with diameter of 14 mm.

## REFERENCE

1. L. C. Schmidt, A. Pertegás, S. González-Carrero, O. Malinkiewicz, S. Agouram, G. Mínguez Espallargas, H. J. Bolink, R. E. Galian and J. Pérez-Prieto, *J. Am. Chem. Soc.*, 2014, **136**, 850-853.
